# Supplementary material for: Global etiology of bacterial meningitis: A systematic review and meta-analysis
Source: PubMed Central journal article supplement (PMC5995389; doi:10.1371/journal.pone.0198772), 2018-06-11
Supplement: pone.0198772.s002.pdf [file pone.0198772.s002.pdf]

# Supplementary Fig 1. Frequency of the seven bacteria pathogens that caused bacterial meningitis among (A) neonates, (B) children aged ±1–5 years, (C) children aged ±6–18 years by geographic region

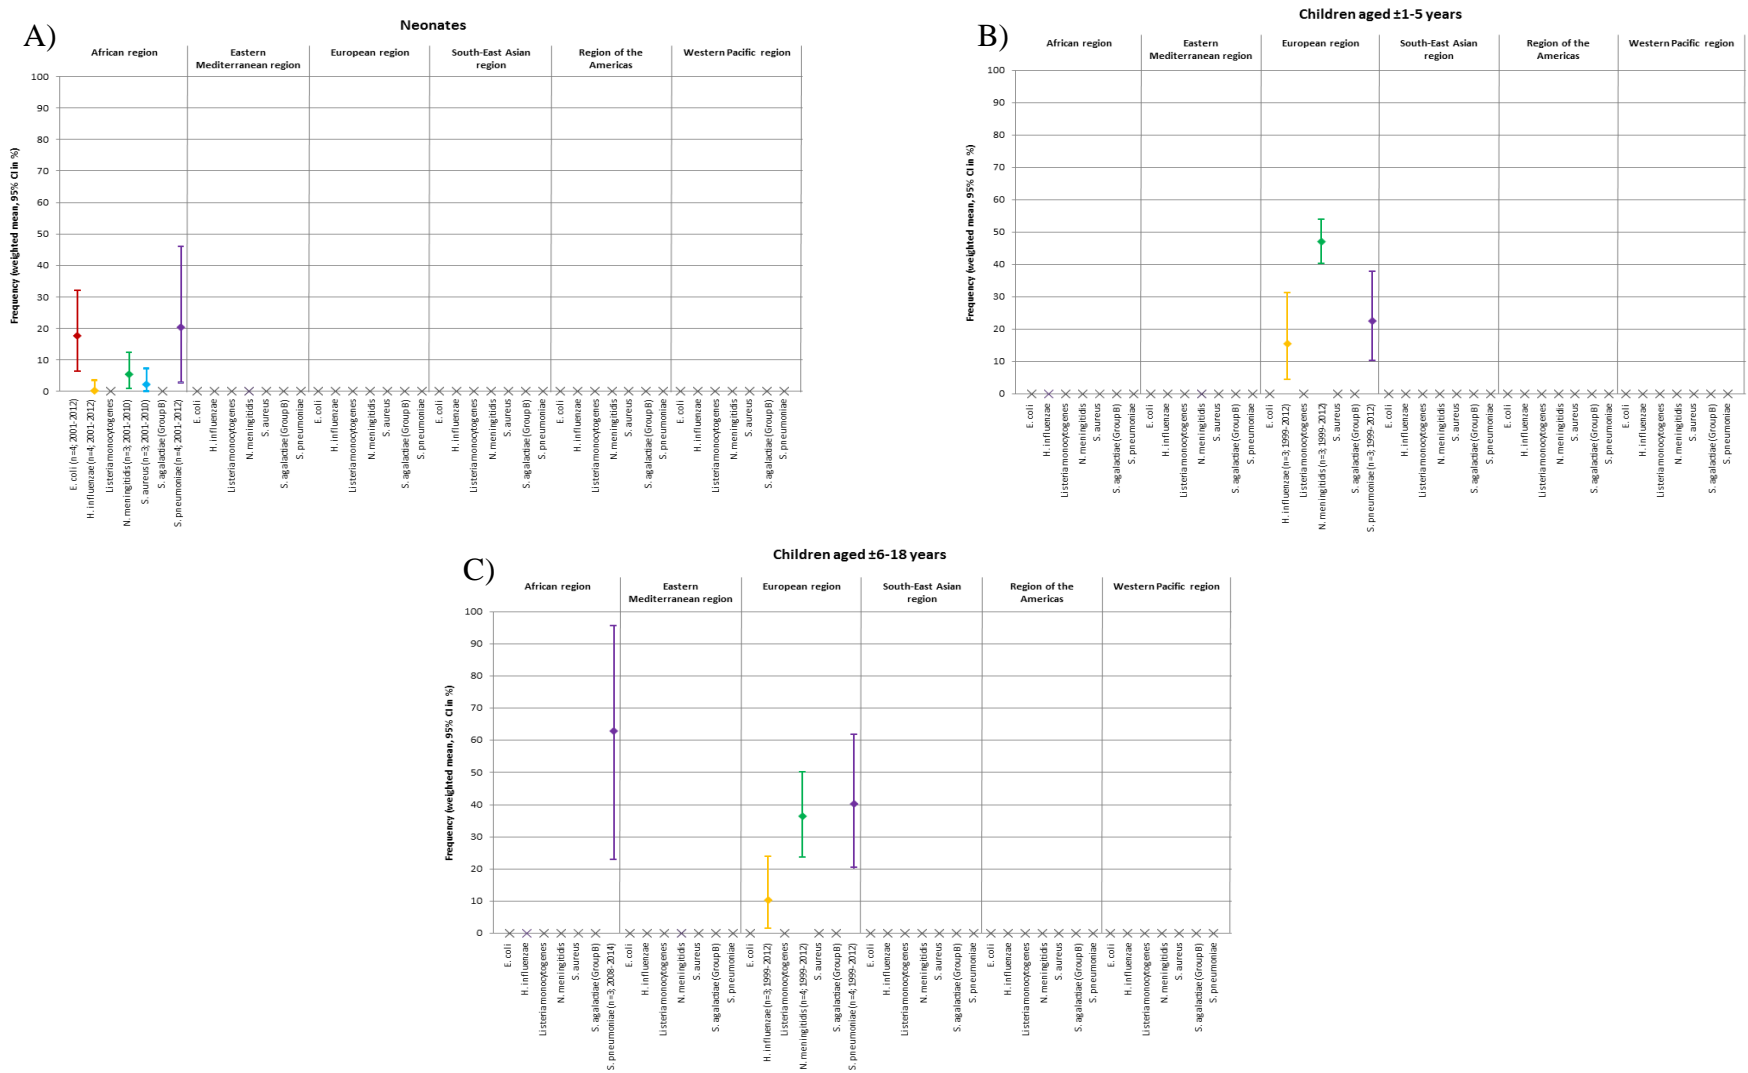

Only analyses for frequency of pathogens in neonates, children aged ±1–5 and ±6–18 years are shown. No data were obtained in children aged ±1 month–1 year.
